# Supplementary material for: A label-free and portable graphene FET aptasensor for children blood lead detection
Source: Springer Nature journal article supplement (doi:10.1038/srep21711), 2016-02-24
Supplement: 41598_2016_BFsrep21711_MOESM1_ESM.pdf [file 41598_2016_BFsrep21711_MOESM1_ESM.pdf]

## Supplementary Information for

# A label-free and portable graphene FET aptasensor for childhood blood lead detection

Chenyu Wang<sup>1</sup>, Xinyi Cui<sup>\*2</sup>, Ying Li<sup>\*3</sup>, Hongbo Li<sup>2</sup>, Lei Huang<sup>2</sup>, Jun Bi<sup>2</sup>, Jun Luo<sup>2</sup>,  
Lena Q. Ma<sup>2</sup>, Wei Zhou<sup>1</sup>, Yi Cao<sup>1</sup>, Baigeng Wang<sup>1</sup>, Feng Miao<sup>\*1</sup>

## Preparation of pyrene-derivatized aptamer 17E

Pyrenebutyric acid (120 mg, 0.416 mmol), *N*-hydroxyl succimide (53 mg, 0.458 mmol) and triethylamine (150  $\mu$ L, 1.05 mmol) were dissolved in dichloromethane (20 mL). The resulted solution was added with 1-ethyl-3-(3-dimethylaminopropyl)carbodiimide hydrochloride (103 mg, 0.540 mmol). The reaction was stirred at room temperature for 24 hr and then concentrated *in vacuo*. The residue was subject to silica gel flash chromatography to give pale red solid as the desired product of pyrene-NHS (78 mg, Yield: 48.6 %). <sup>1</sup>H NMR (500 MHz, CDCl<sub>3</sub> with TMS as the internal standard r.t.):  $\delta$ (ppm) 2.34 (2 H, *quintet*, *J* = 7.43 Hz), 2.77 (2 H, *t*, *J* = 7.10 Hz), 2.88 (4 H, *s*), 3.51 (2 H, *t*, *J* = 7.72 Hz), 7.91 (1 H, *d*, *J* = 7.76 Hz), 8.03 (3 H, *m*), 8.18 (4 H, *m*), 8.32 (1 H, *d*, *J* = 9.22 Hz).

3'-Amino derivatized aptamer 17E (sequence: 5'-

GACATCTCTTCTCCGAGCCGGTCGAAA TAGTGAGTTTTTT-3', 16.8 nmol) was

first dissolved in autoclaved ddH<sub>2</sub>O (300  $\mu$ L) and 8% cetyl trimethylammonium

bromide (CTAB, 5  $\mu$ L) was added to the solution to precipitate the oligonucleotide.

The mixture was subject to centrifuge at 13k rpm for 10 min. Another 3  $\mu\text{L}$  of the CTAB solution was added to further precipitate the oligonucleotide (generally the solution did not turn cloudy this time). The mixture was again centrifuged at 13k rpm for 10 min. The supernatant was removed, and the pellet was washed with autoclaved ddH<sub>2</sub>O (1 mL) three times, dissolved in anhydrous ethanol (600  $\mu\text{L}$ ) and dried in a Speed Vac for 1.5 hr. Then the oligonucleotide pellet was added with the pale red pyrene-NHS (10 mg, 0.0259 mmol) in 60  $\mu\text{L}$  DMSO and the mixture was stored at room temperature for 20 hr until 1% lithium perchlorate in acetone (1 mL) was added to the reaction to result in white precipitation. The mixture was spun at 13k rpm for 10 min and the supernatant was removed. The pellet was washed with 1% lithium perchlorate in acetone (1 mL) twice and anhydrous ethanol (1 mL) three times. Then the pellet was dried in the air for a while before 300  $\mu\text{L}$  autoclaved ddH<sub>2</sub>O was added to make a stock solution of around 50  $\mu\text{M}$ .

#### **Additional measurements of standard solution**

We detected  $Pb^{2+}$  concentration of standard solution with four devices and data are shown in Figure S2. There is a clear positive correlation between  $Pb^{2+}$  concentration and  $\Delta V_{\text{cnp}}$  in all devices. But there are obvious differences among each other, indicating the poor uniformity of our devices.

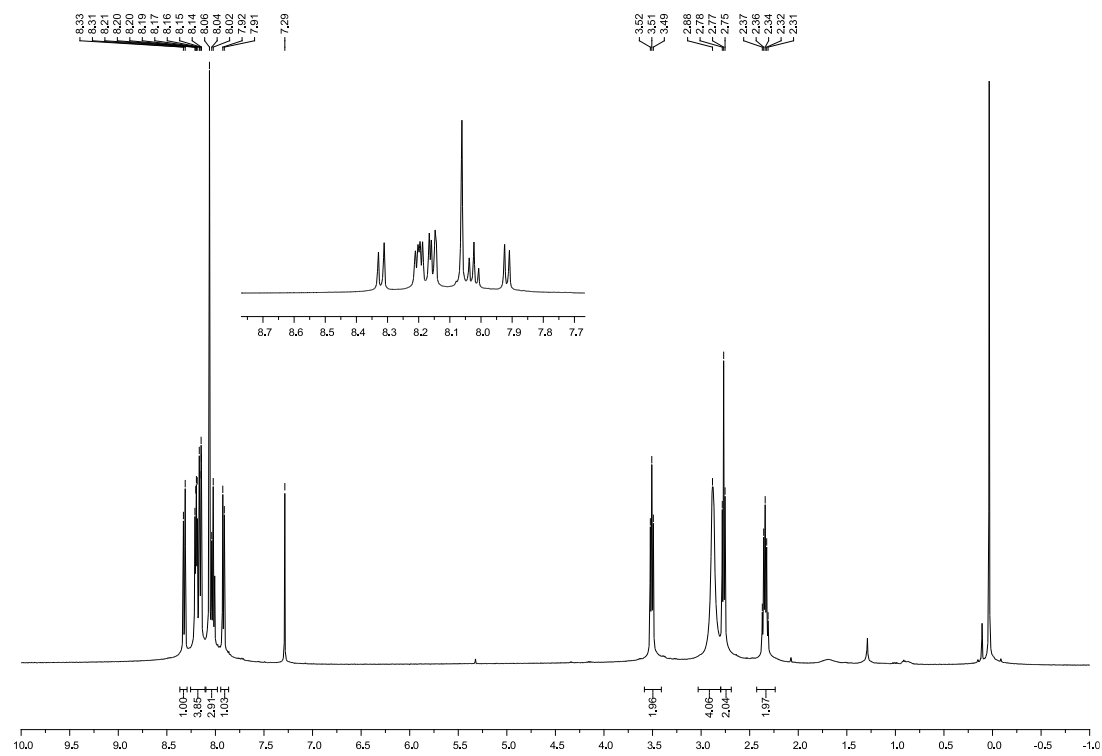

**Figure S1**  $^1\text{H}$  NMR spectrum of pyrene-NHS

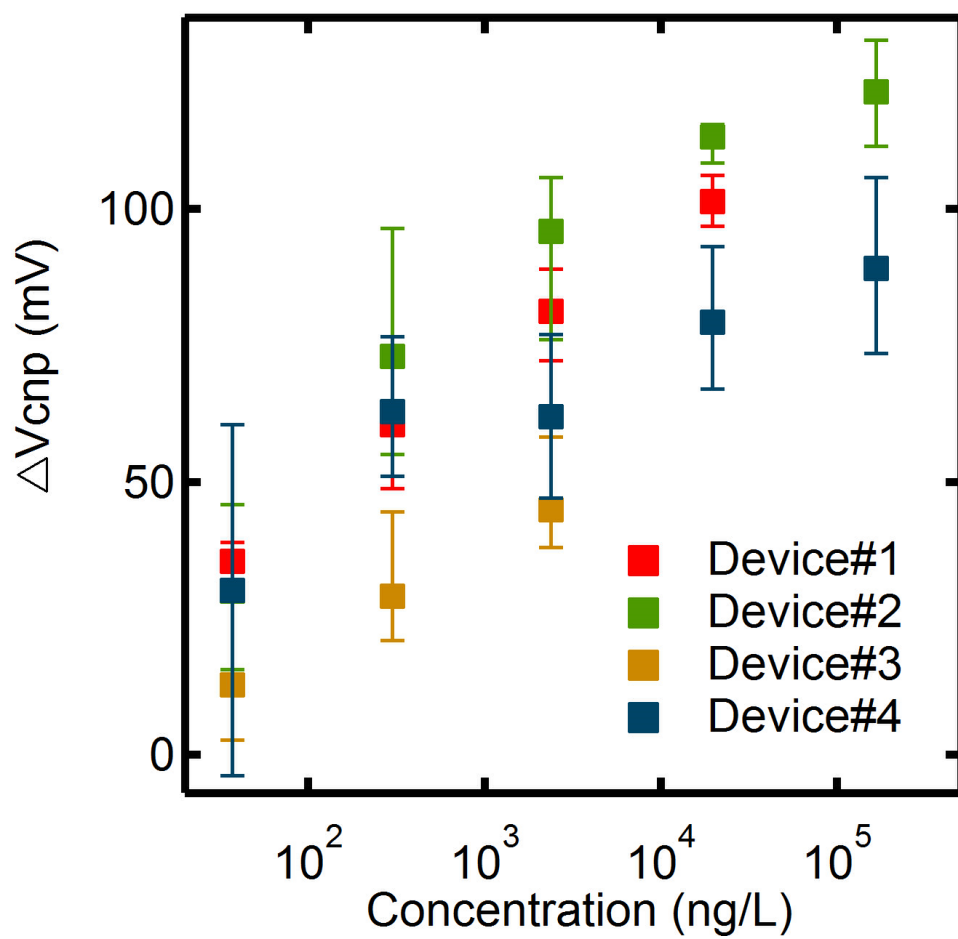

Figure S2 Standard solution detected by four devices
